# Instructions for Obtaining ANESTHESIOLOGY Continuing Medical Education (CME) Credit

CME Editors: Leslie C. Jameson, M.D., and Dan J. Kopacz, M.D.

ANESTHESIOLOGY's Journal CME is open to all readers. Members of the American Society of Anesthesiologists (ASA) enjoy a preferred rate for their subscription. However, Journal CME is not limited to ASA members or Journal subscribers. To take part in Journal CME, complete the following steps:

1. For the article listed on the right, read the learning objectives and disclosure information.
2. Read the article in the print or online edition.
3. Register at [www.asahq.org/journal-cme](http://www.asahq.org/journal-cme) and provide payment.
4. Once online, complete the questions and other required information for the CME program, including the evaluation.

The American Society of Anesthesiologists is accredited by the Accreditation Council for Continuing Medical Education to provide continuing medical education for physicians.

The American Society of Anesthesiologists designates this educational activity for a maximum of 1 *AMA PRA Category 1 Credit(s)*<sup>TM</sup>. Physicians should only claim credit commensurate with the extent of their participation in the activity.

**Purpose:** The focus of ANESTHESIOLOGY Journal CME is to educate readers on current developments in the science and clinical practice of anesthesiology.

**Target Audience:** ANESTHESIOLOGY Journal CME is designed for physicians involved with anesthesiology education, clinical practice, and research.

## Journal CME Planning Participants Disclosures

**Editor-in-Chief:** James C. Eisenach, M.D., has no relevant financial relationships to disclose.

**CME Editors:** Leslie C. Jameson, M.D., and Dan J. Kopacz, M.D., have no relevant financial relationships to disclose.

**ASA Staff:** Employees involved in planning have no relevant financial relationships to disclose.

## Claiming Credit

All tests and requests for credit must be submitted through the ANESTHESIOLOGY CME website at [www.asahq.org/journal-cme](http://www.asahq.org/journal-cme). Participants should claim credit in 15-minute increments, for a maximum of 1 *AMA PRA Category 1 Credit(s)*<sup>TM</sup> per journal article.

Two payment options are available:

|            | ASA Member | Non-member |
|------------|------------|------------|
| Annual Fee | \$60       | \$120      |
| Per Issue  | \$10       | \$20       |

Payment may be made using Visa or MasterCard.

Please direct any questions about Journal CME to:

Joyce Canselor  
Education Coordinator, CME  
(847) 268-9185  
[j.canselor@asahq.org](mailto:j.canselor@asahq.org)

## This Month's ANESTHESIOLOGY Journal CME

Read the article by Sackey *et al.* entitled "Tailored sedation to the individual needs of the intensive care unit patient" on page 1439 and the accompanying editorial by Payen entitled "Toward tailored sedation with halogenated anesthetics in the intensive care unit?" on page 1268 of this issue.

## Learning Objective(s)

After completing this activity, the learner should be able to understand the patient comfort, safety, and situational considerations in designing a tailored sedation strategy for an intensive care unit (ICU) patient; differentiate between the advantages and disadvantages of various agents available to provide sedation and analgesia for the ICU patient; and recognize how critical illness and multiorgan failure affect the pharmacokinetic and pharmacodynamic profiles of sedation drugs.

## Author(s) Disclosures

**Authors:** Peter V. Sackey, M.D., Ph.D., has received lecture honoraria from Abbott Scandinavia, Stockholm, Sweden, and advisory honoraria from Baxter Global, Paris, France. Lars I. Eriksson, M.D., Ph.D., has received lecture and advisory honoraria from Abbott Scandinavia, Stockholm, Sweden, and Schering-Plough (part of Merck Inc., USA). Claes-Roland Martling, M.D., Ph.D., and Peter J. Radell, M.D., Ph.D., have no financial interest in or affiliation with any commercial supporter or providers of any commercial services discussed in this educational material.

**Author:** Jean-Francois Payen, M.D., Ph.D., has no financial interest in or affiliation with any commercial supporter or providers of any commercial services discussed in this educational material.

## Expiration

Registration and submission of answers must be completed by December 31, 2013.
